# Supplementary material for: Enhanced tin halide perovskite solar cells via crystal growth control using a multifunctional interfacial modifier
Source: Royal Society of Chemistry journal article supplement (doi:10.1039/d4ta07825j), 2025-01-01
Supplement: d4ta07825j1.pdf [file d4ta07825j1.pdf]

## Supplementary Information

### Enhanced Tin Halide Perovskite Solar Cells via Crystal Growth Control Using a Multifunctional Interfacial Modifier

*Jun Ryu*<sup>1</sup>, *Padmini Pandey*<sup>2</sup>, *Saemon Yoon*<sup>1</sup>, *Sung-Won Cho*<sup>1</sup>, *Seojun Lee*<sup>1</sup>, *Rashi Kedia*<sup>2</sup>, *Jincheol Kim*<sup>3</sup>, *Jongsung Park*<sup>4,\*</sup> and *Dong-Won Kang*<sup>1,2,\*</sup>

<sup>1</sup> Department of Smart Cities, Chung-Ang University, 84 Heukseok-ro, Dongjak-gu, Seoul 06974, Republic of Korea.

<sup>2</sup> Department of Energy Systems Engineering, Chung-Ang University, 84 Heukseok-ro, Dongjak-gu, Seoul 06974, Republic of Korea.

<sup>3</sup> School of Engineering, Macquarie University, Sydney, NSW 2109, Australia

<sup>4</sup> Department of Energy Engineering, Department of Energy System Engineering, Gyeongsang National University, Jinju, Gyeongnam 52828, Republic of Korea

\* Corresponding author: D-. W. Kang (E-mail: [kangdwn@cau.ac.kr](mailto:kangdwn@cau.ac.kr)), J. Park (E-mail: [j.park@gnu.ac.kr](mailto:j.park@gnu.ac.kr))

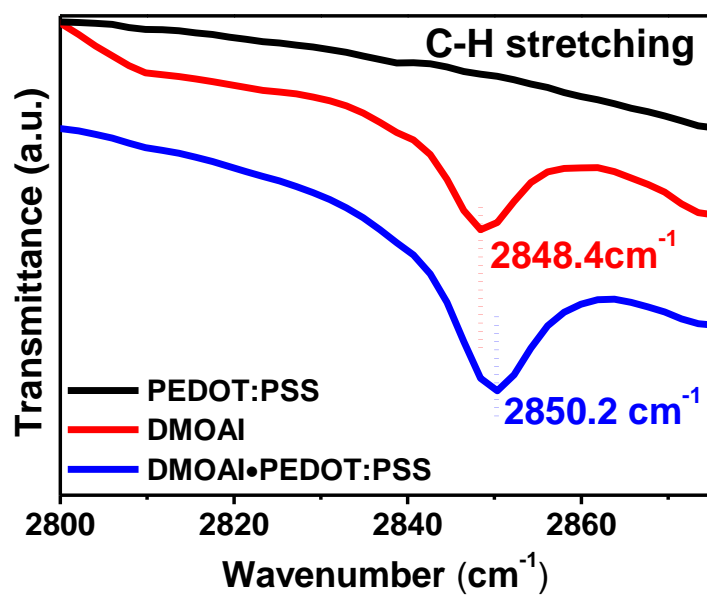

**Figure S1.** Liquid state FT-IR spectroscopy comparative analysis of the PEDOT: PSS, DMOAI, and DMOAI•PEDOT:PSS complex of C-H stretching mode.

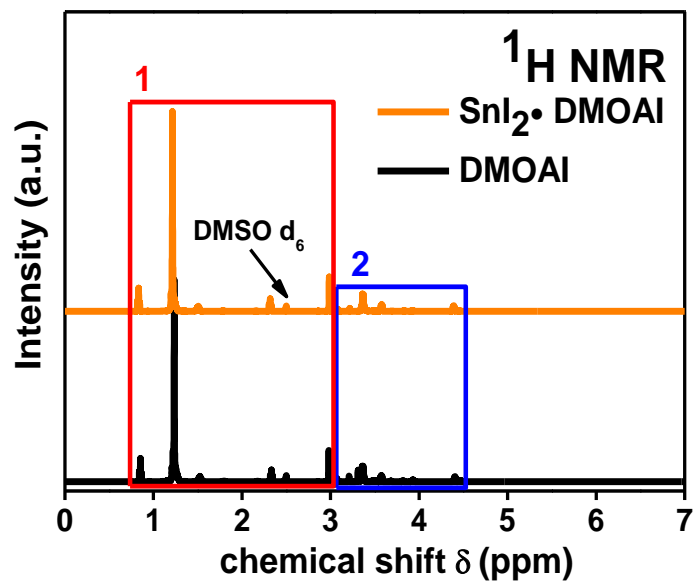

**Figure S2.** Liquid state  $^1\text{H}$  NMR full spectra of  $\text{DMOAI}$  and  $\text{SnI}_2 \cdot \text{DMOAI}$  complex in  $\text{DMSO-d}_6$ .

# DMOAI

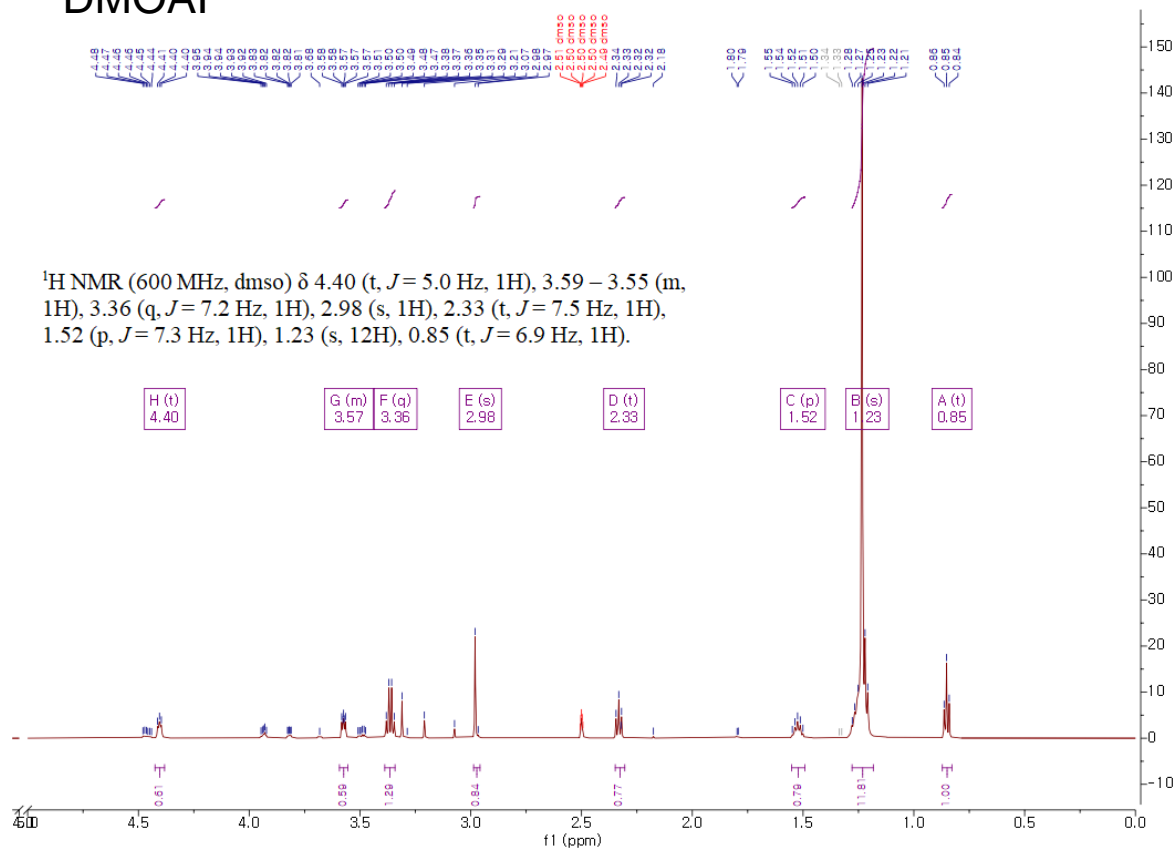

**Figure S3.** Experimental result of <sup>1</sup>H NMR spectrum of DMOAI with estimated chemical shifts.

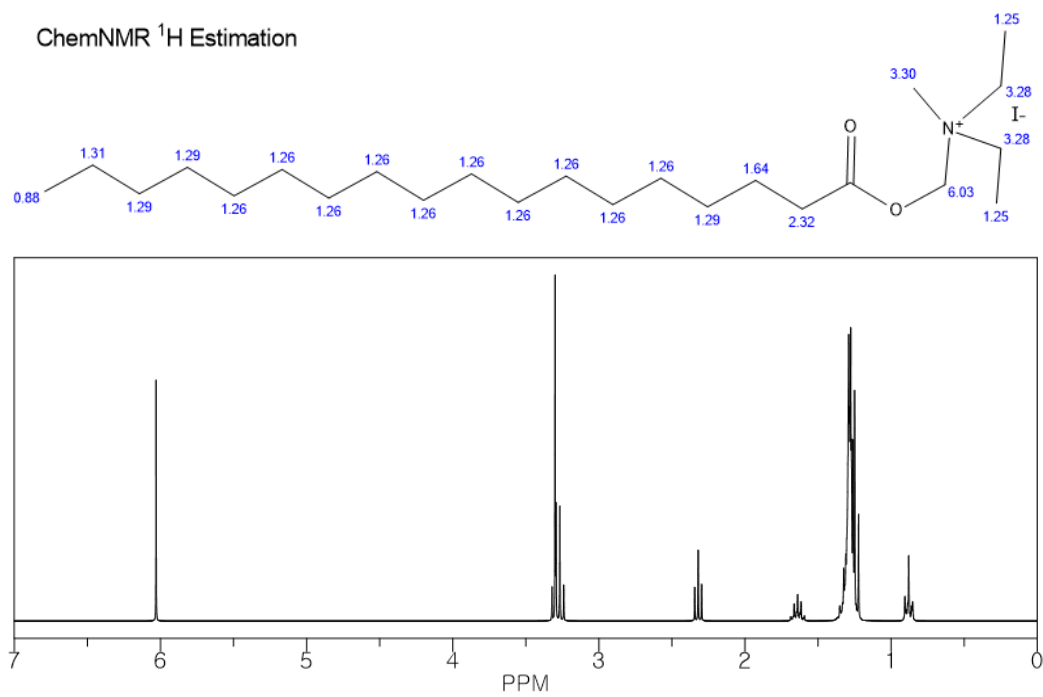

**Figure S4.** Simulated  $^1\text{H}$  NMR spectrum of DMOAI, including its molecular structure and estimated chemical shifts.

# DMOAI+SnI<sub>2</sub>

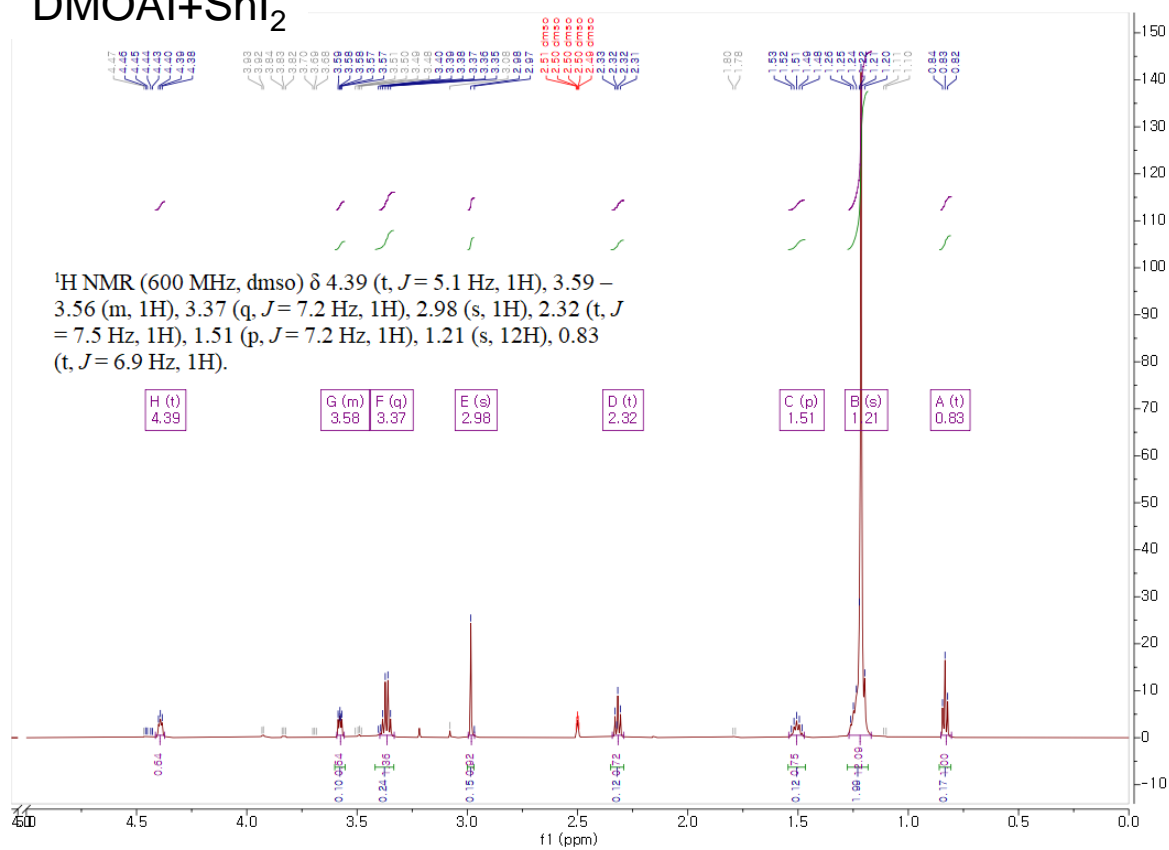

**Figure S5.** Experimental result of <sup>1</sup>H NMR spectrum of SnI<sub>2</sub>•DMOAI complex with estimated chemical shifts.

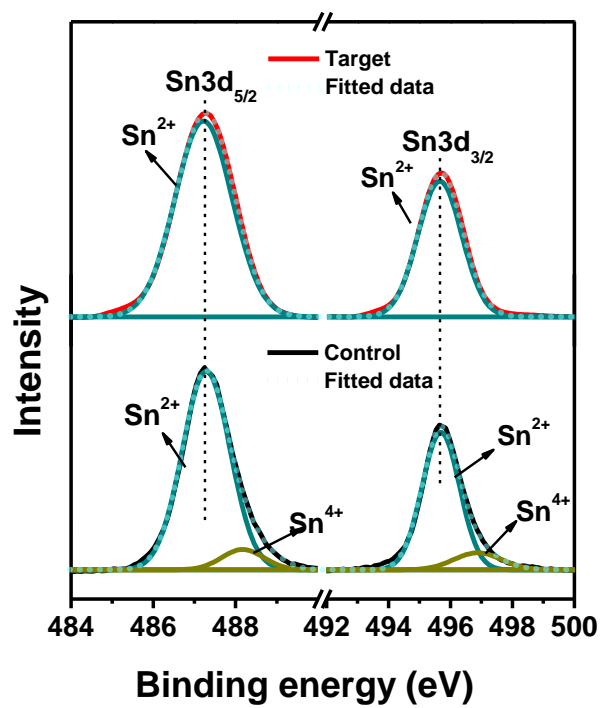

**Figure S6.** XPS core spectra (a) Sn of control and target Sn-HP films.

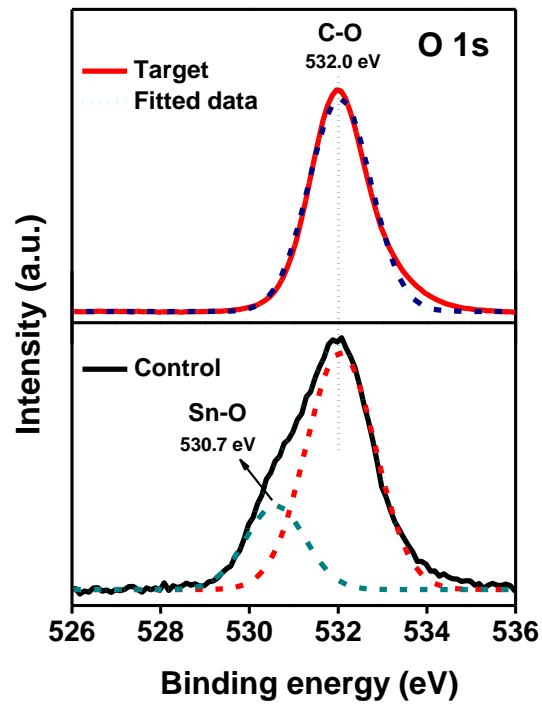

**Figure S7.** XPS core spectra (a) Sn of control and target Sn-HP films.



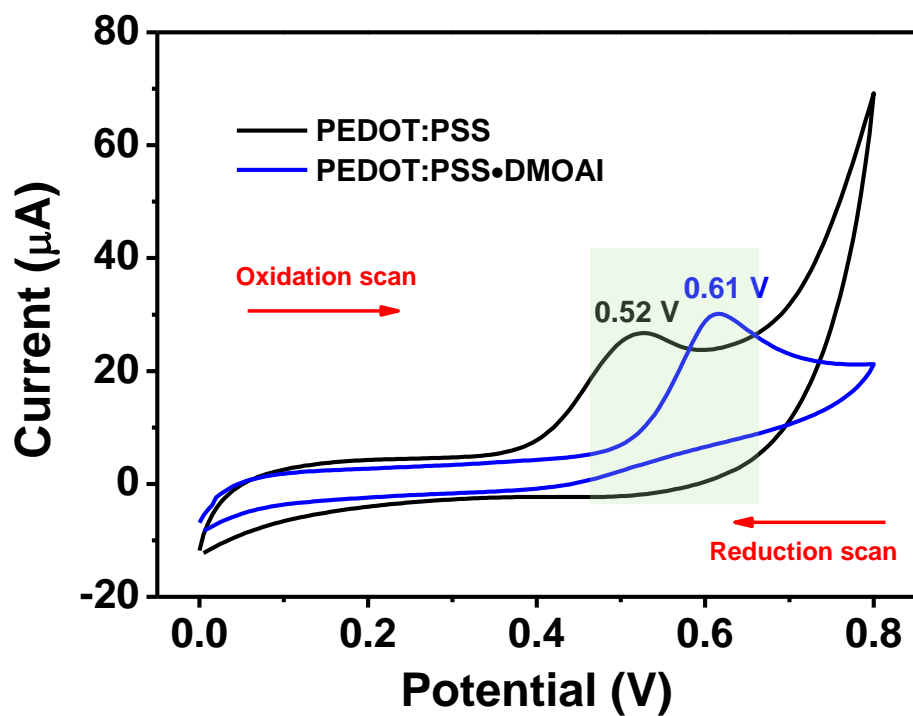

**Figure S8.** Cyclic voltammetry measurement of PEDOT:PSS and PEDOT:PSS•DMOAI complex films.

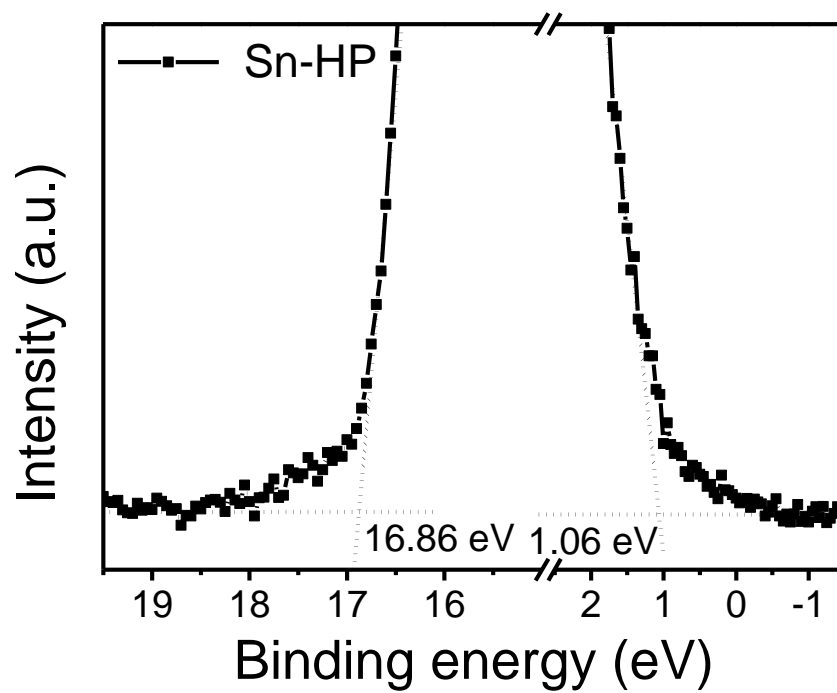

**Figure S9.** UPS spectrum of Sn-HP.

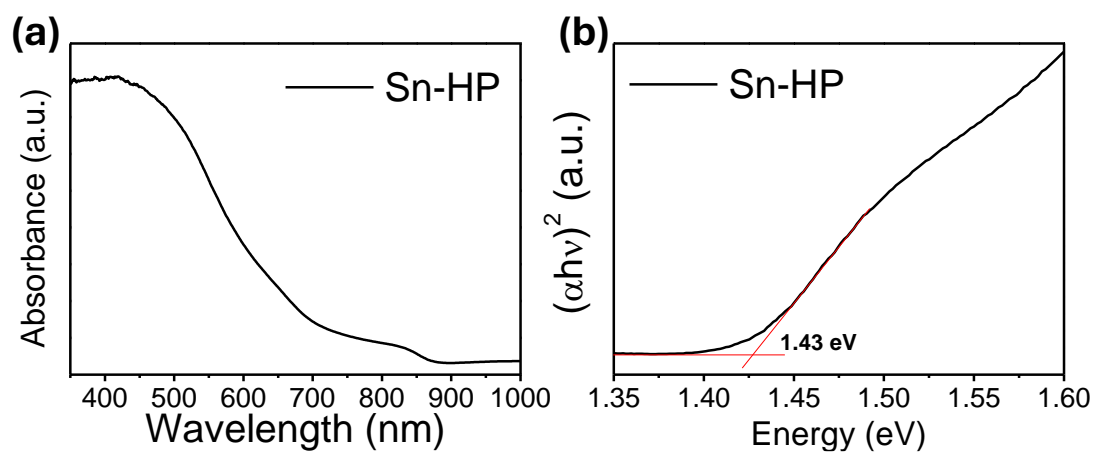

**Figure S10.** (a) UV-vis absorption spectrum of the Sn-HP film (b) Tauc plot derived from the absorption spectrum.

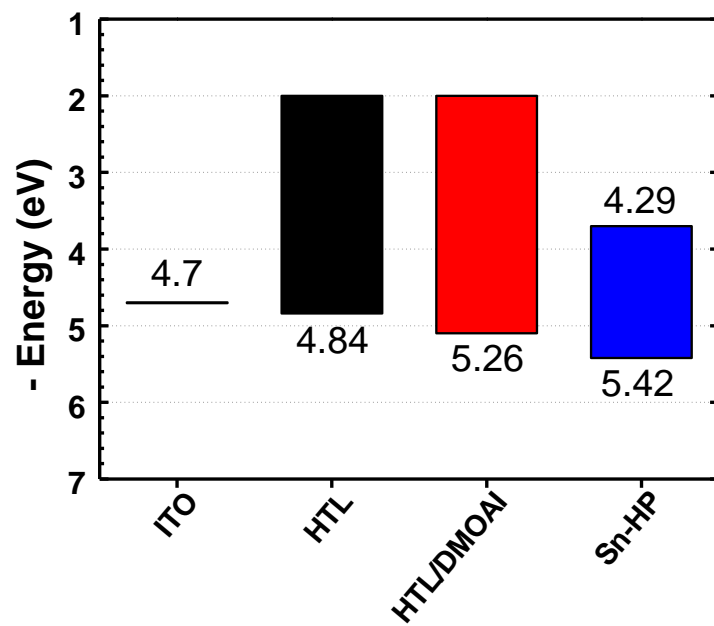

**Figure S11.** Schematic energy band diagram comparing valence band maximum (VBM) of HTL (PEDOT:PSS) or HTL/DMOAI with Sn-HP layer.

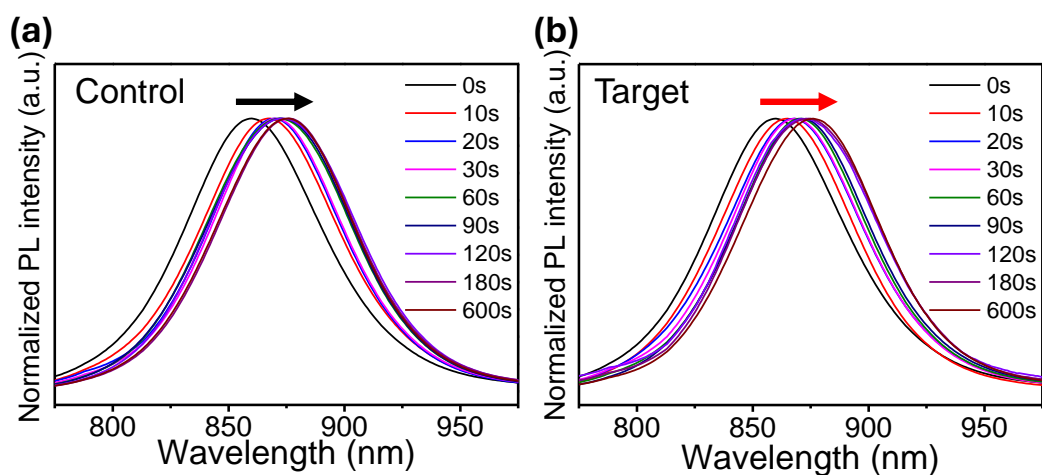

**Figure S12.** SS-PL dependent on annealing time for Sn-HP growth on (a) PEDOT:PSS (control) and (b) PEDOT:PSS/DMOAI bilayer (target).

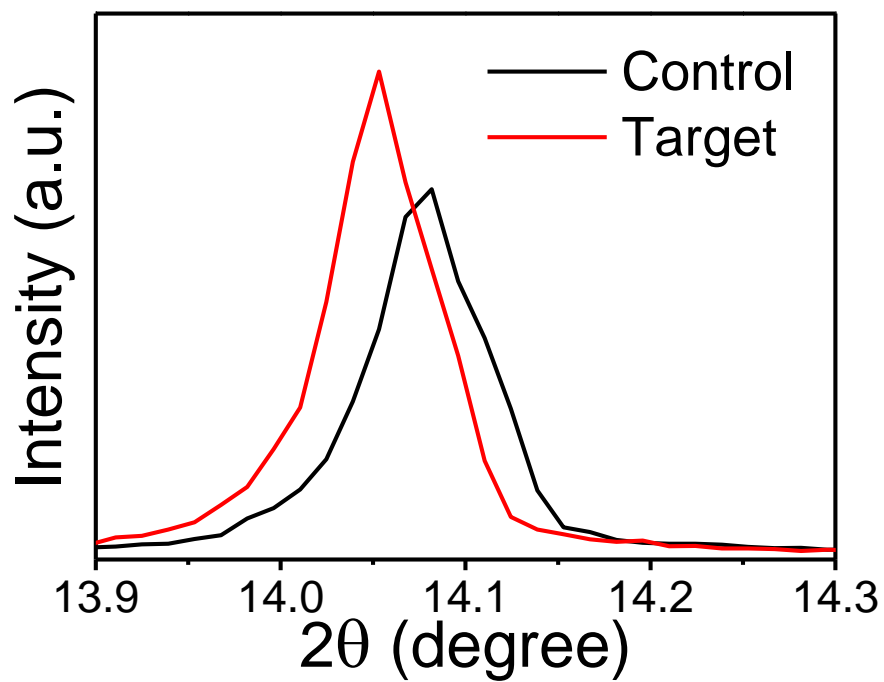

**Figure S13.** Enlarged XRD pattern corresponding to the (100) plane peak for control and target films.

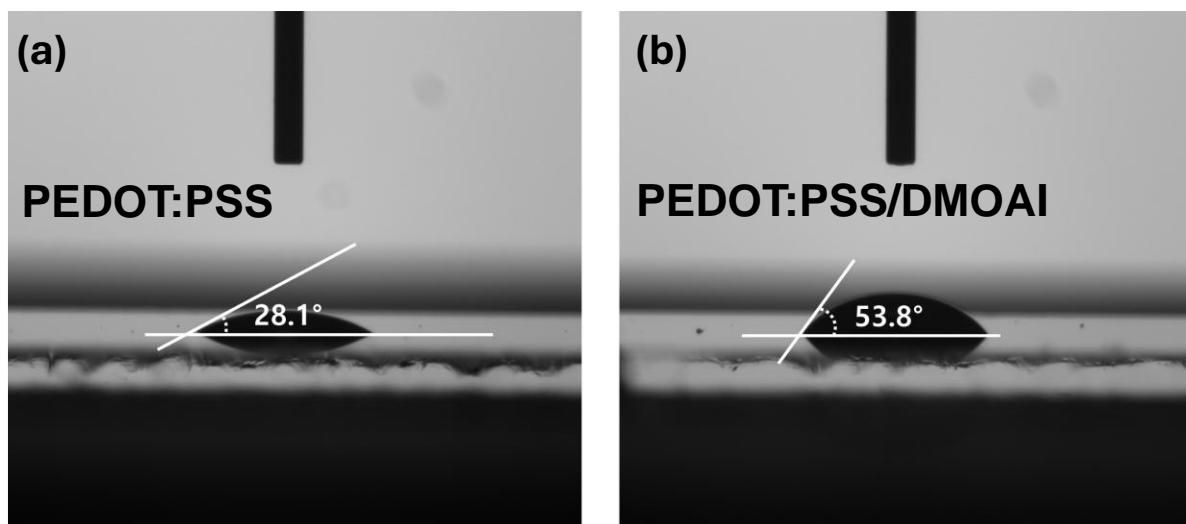

**Figure S14.** Contact angle of (a) PEDOT:PSS and (b) PEDOT:PSS/DMOAI films using diiodomethane as the solvent.

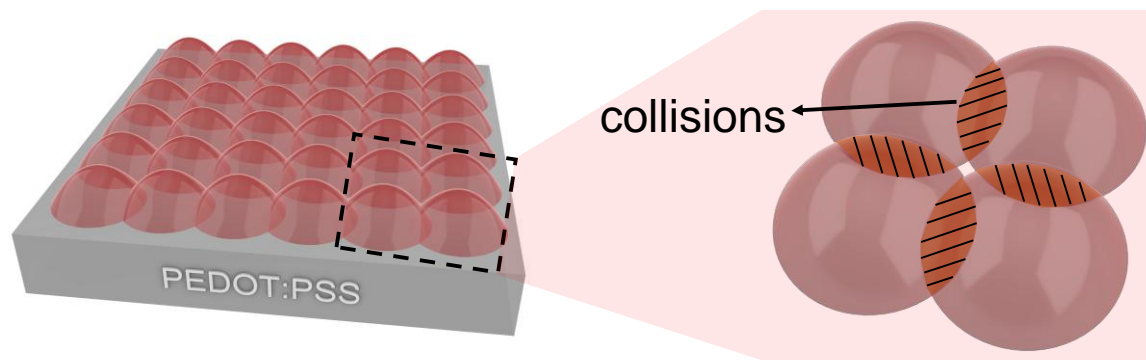

**Figure S15.** Schematic illustration of crystal collisions during nucleation, induced by an increased density of nuclei.



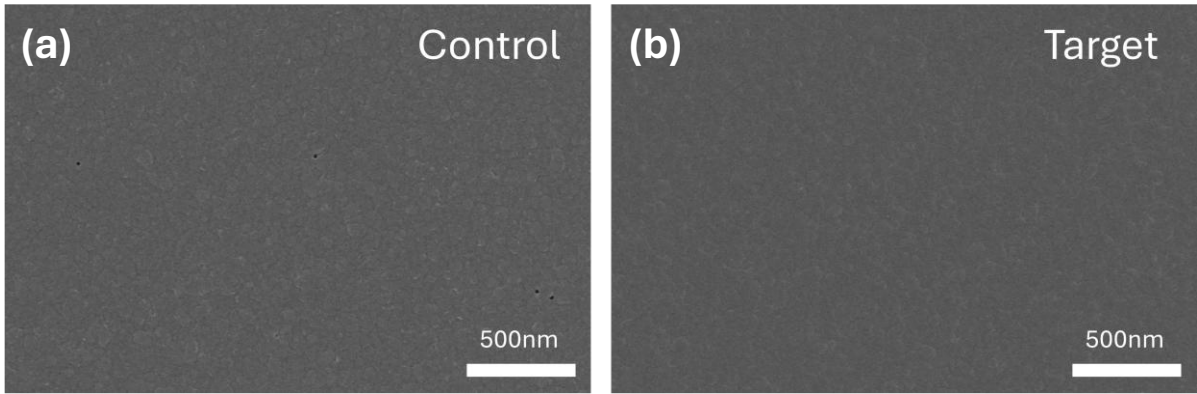

**Figure S16.** Low-magnification FE-SEM top view image of (a) Control and (b) Target.

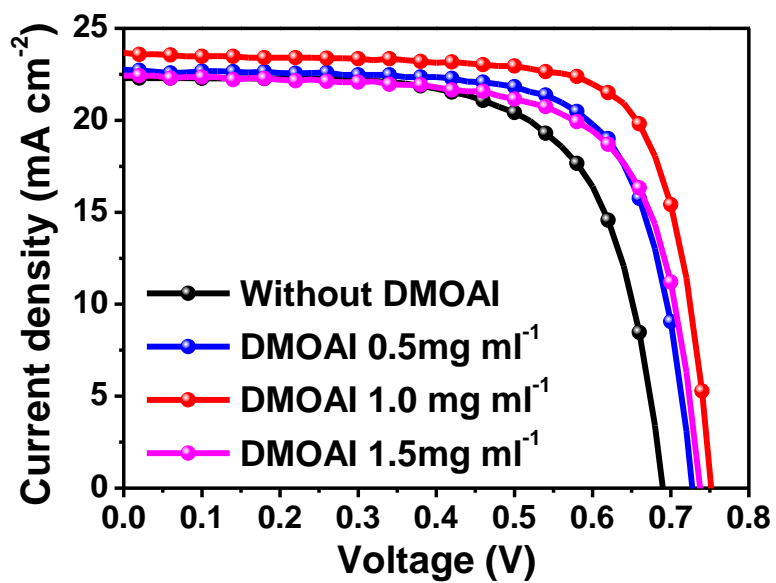

**Figure S17.** J-V characteristic curves for various concentrations of DMOAI based Sn-HPSCs.

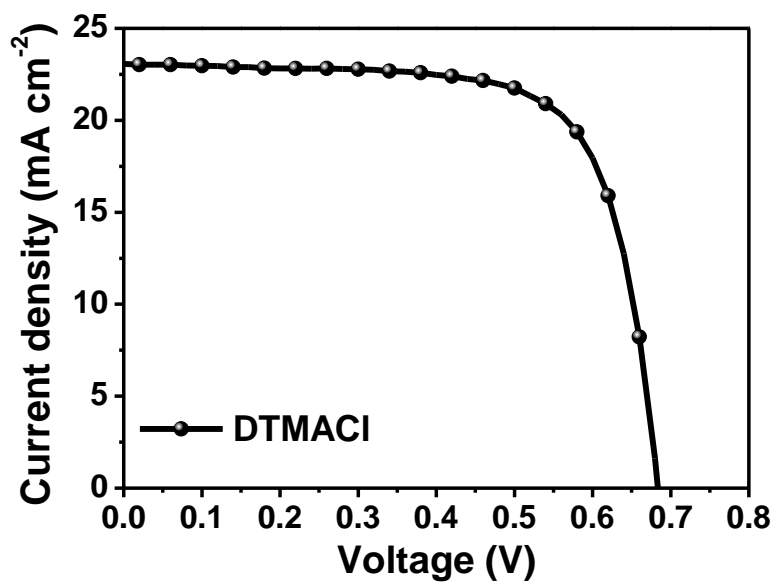

**Figure S18.** J-V characteristic curves of DTMACl based Sn-HPSC.

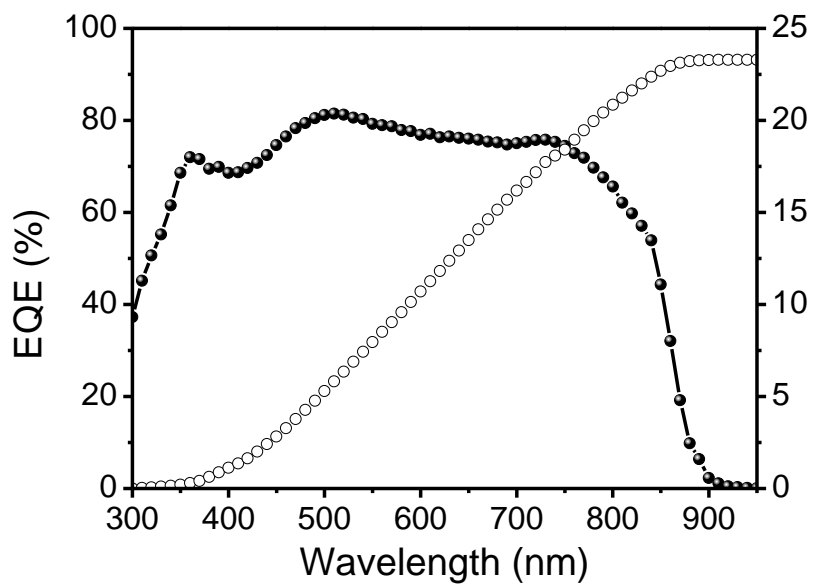

**Figure S19.** EQE and integrated  $J_{sc}$  of DTMACl based Sn-HPSC.

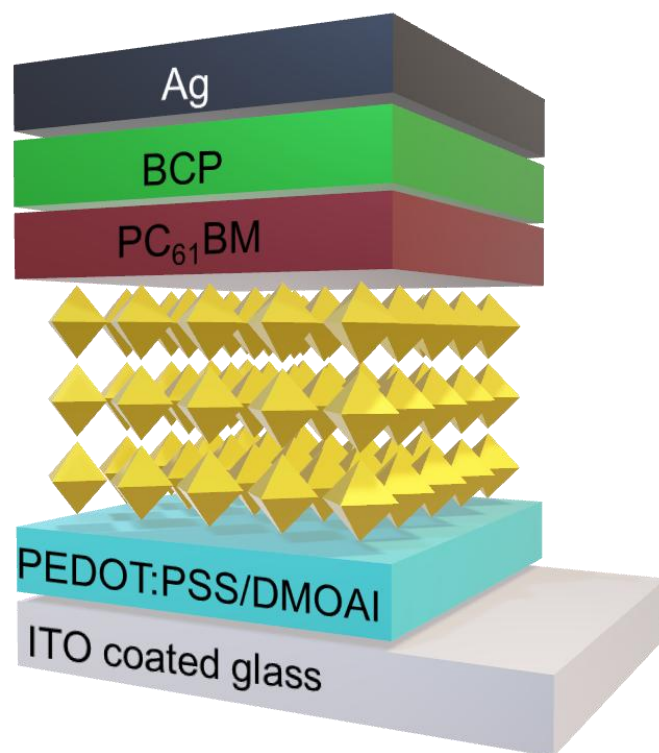

**Figure S20.** Schematic illustration of wide-bandgap Sn-HPSC structure.

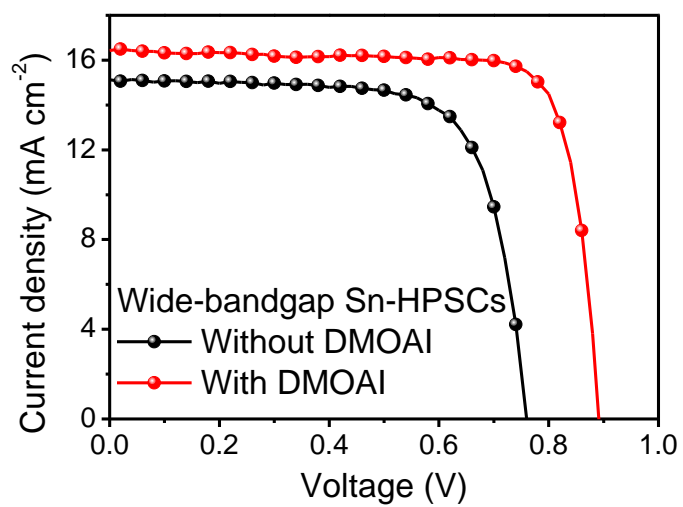

**Figure S21.** J-V characteristic curves for wide-bandgap Sn-HPSCs without and with DMOAI.

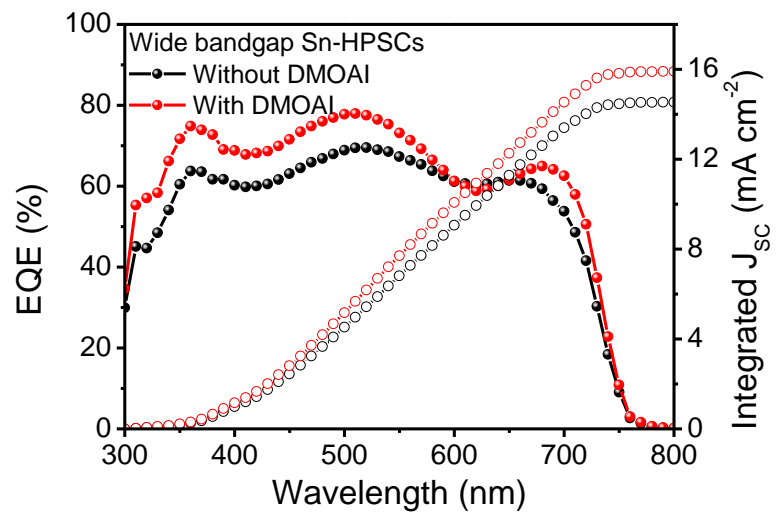

**Figure S22.** EQE and integrated  $J_{sc}$  of wide-bandgap Sn-HPSCs without and with DMOAI.

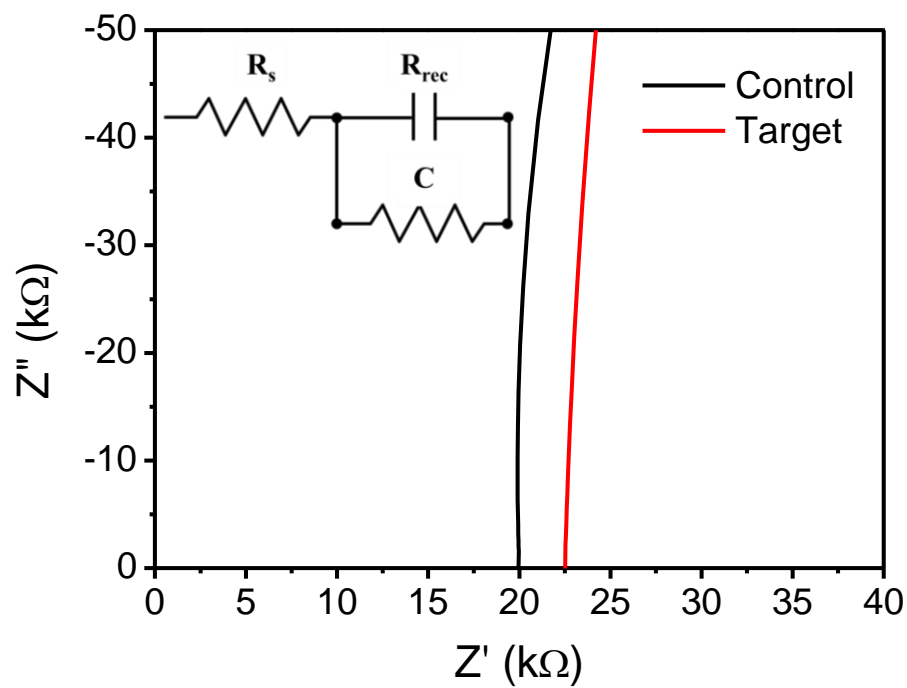

**Figure S23.** Nyquist plots for control and target devices, with an equivalent circuit diagram representation in the high-frequency region.



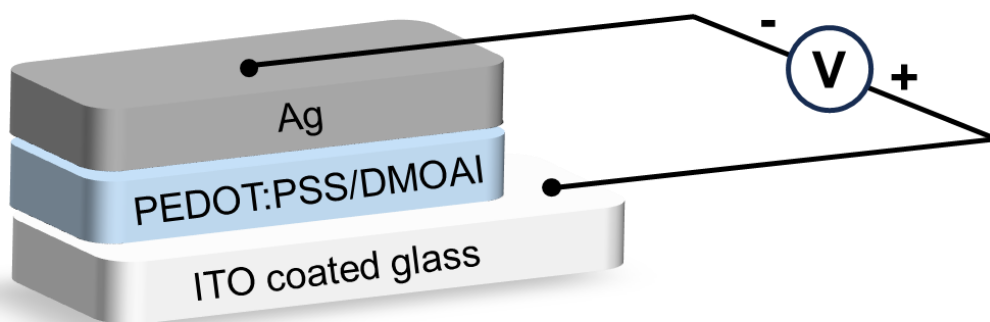

**Figure S24.** Illustration of the device structure for HTL-only devices used to measure the conductivity of the HTL.

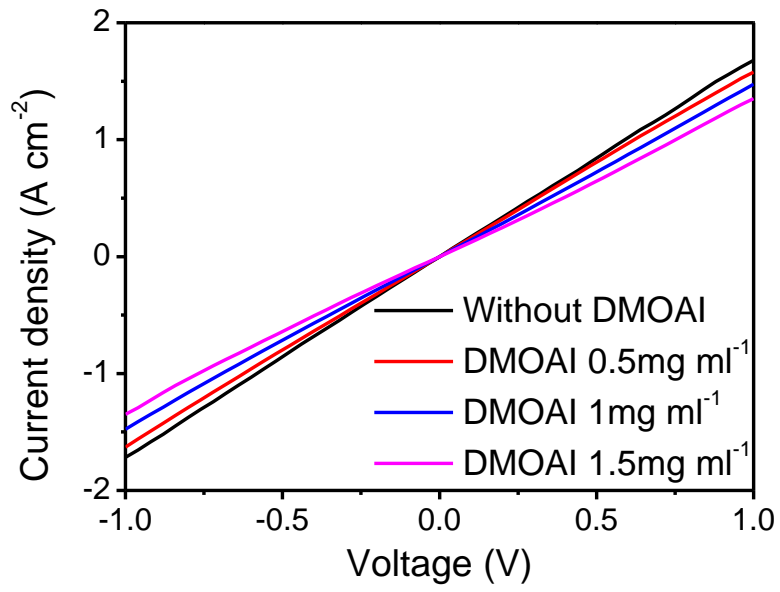

**Figure S25.** Vertical conductivity measurements of HTL-only devices with varying DMOAI concentrations, based on the structure shown in Figure S24.

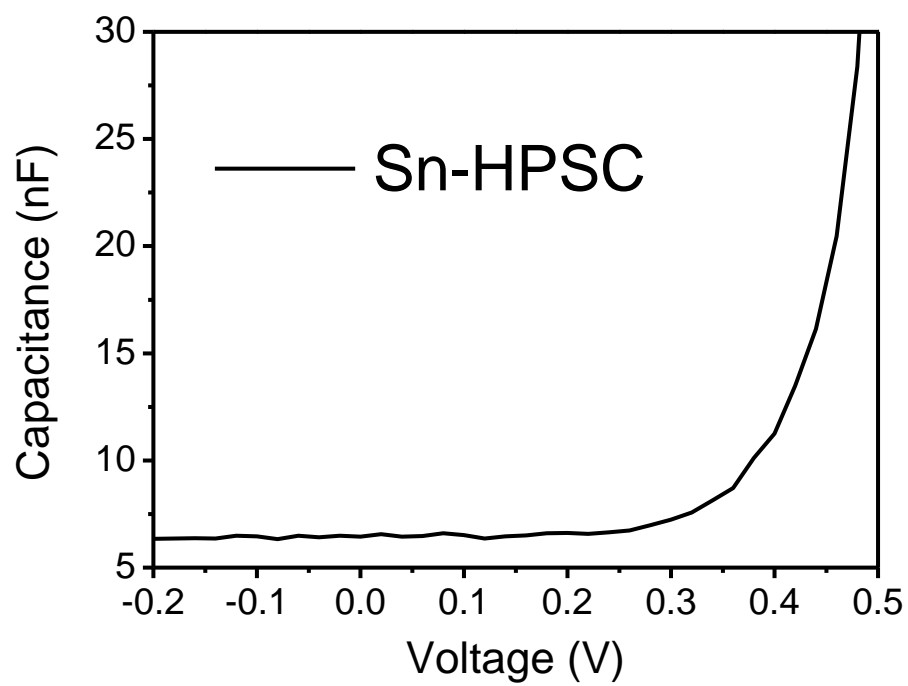

**Figure S26.** C-V measurement of Sn-HPSC.

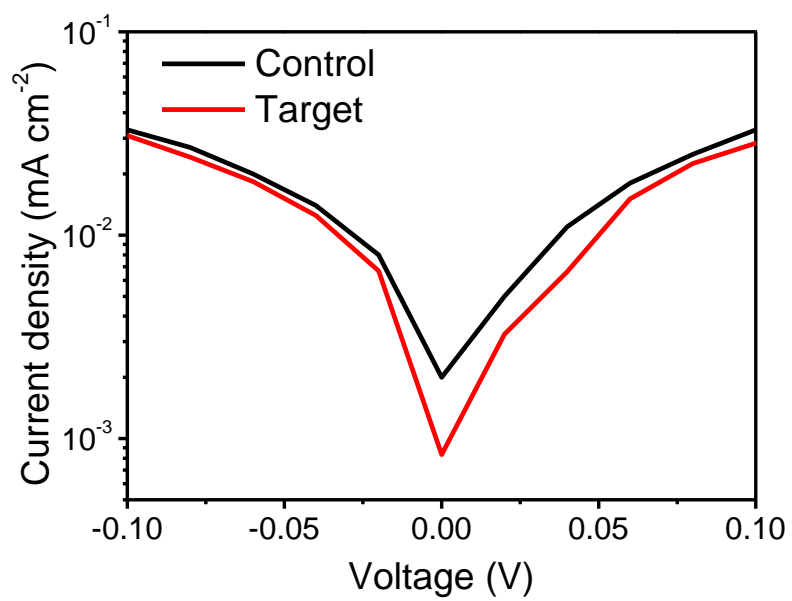

**Figure S27.** Enlarged dark J-V characteristic curves in region A for control and target Sn-HPSCs.

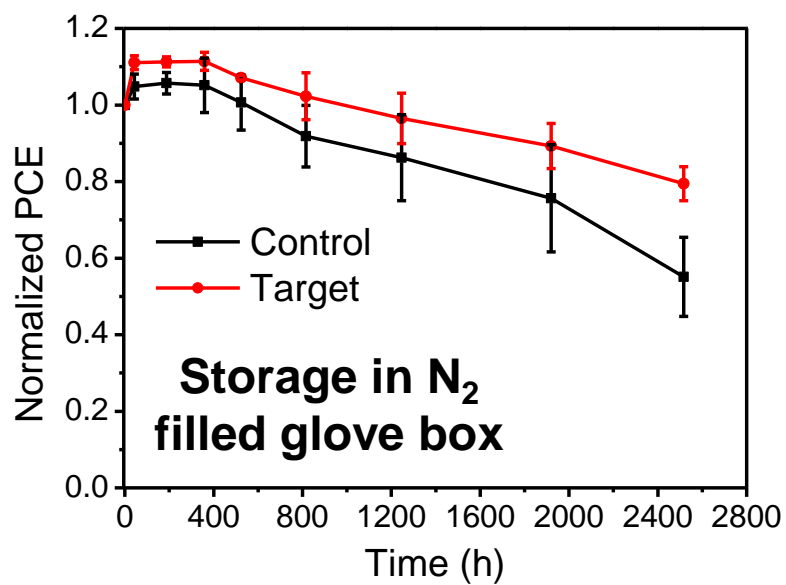

**Figure S28.** Normalized PCE graphs for control and target Sn-HPSCs stored under N<sub>2</sub> atmospheric conditions without encapsulation (measured under ambient conditions).

**Table S1.** Steady state photoluminescence peak position dependent on annealing time for Sn-HP growth on (a) PEDOT:PSS (control) and (b) PEDOT:PSS/DMOAI bi-layer (target) based on Figure S3.

| Time (s)           |         | 0     | 10    | 20    | 30    | 60    | 90    | 120   | 180   | 600   |
|--------------------|---------|-------|-------|-------|-------|-------|-------|-------|-------|-------|
| Peak position (nm) | Control | 860.5 | 867.5 | 869.5 | 870.5 | 872.0 | 873.0 | 874.0 | 875.5 | 876.0 |
|                    | Target  | 860.0 | 865.0 | 868.0 | 868.5 | 870.5 | 871.5 | 873.0 | 874.5 | 876.0 |

**Table S2.** Key parameters obtained from Scherrer formula analysis of the (100) plane peak for control and target films, as shown in Figure S4.

| Parameter             | Control | Target  |
|-----------------------|---------|---------|
| FWHM (°)              | 0.072   | 0.065   |
| Peak angle (°)        | 14.081  | 14.053  |
| Crystallite size (nm) | 111.024 | 122.343 |

**Table S3.** Disperse ( $\gamma_L^D$ ) and polar components ( $\gamma_L^P$ ) of surface energy for water and diiodo-methane.

| Solvents       | $\gamma_L^D$ (mN/m) | $\gamma_L^P$ (mN/m) |
|----------------|---------------------|---------------------|
| Water          | 21.8                | 72.8                |
| Diiodo-methane | 50.8                | 0                   |

**Table S4.** PV parameters for Sn-HPSCs with various concentrations of DMOAI.

|                | $V_{oc}$ (V) | $J_{sc}$ (mA cm <sup>-2</sup> ) | FF (%) | PCE (%) |
|----------------|--------------|---------------------------------|--------|---------|
| Without DMOAI  | 0.69         | 22.23                           | 67.93  | 10.42   |
| DMOAI 0.5mg/ml | 0.73         | 22.75                           | 71.75  | 11.88   |
| DMOAI 1 mg/ml  | 0.75         | 23.68                           | 75.24  | 13.39   |
| DMOAI 1.5mg/ml | 0.74         | 22.43                           | 70.47  | 11.66   |

**Table S5.** PV parameters of wide-bandgap Sn-HPSCs without and with DMOAI.

|               |          | V <sub>oc</sub> (V) | J <sub>sc</sub> (mA cm <sup>-2</sup> ) | FF (%)       | PCE (%)      |
|---------------|----------|---------------------|----------------------------------------|--------------|--------------|
| Without DMOAI | Champion | 0.76                | 15.13                                  | 72.69        | 8.35         |
|               | Average  | 0.74 ± 0.02         | 15.09 ± 0.45                           | 70.74 ± 2.94 | 7.87 ± 0.44  |
| With DMOAI    | Champion | 0.89                | 16.43                                  | 80.47        | 11.78        |
|               | Average  | 0.88 ± 0.01         | 16.06 ± 0.31                           | 80.72 ± 1.35 | 11.37 ± 0.27 |
